# Supplementary material for: Structural basis of carnitine monooxygenase CntA substrate specificity, inhibition, and intersubunit electron transfer
Source: PubMed Central journal article supplement (PMC7948474; doi:10.1074/jbc.ra120.016019), 2020-11-23
Supplement: mmc1.pdf [file mmc1.pdf]

## Supplementary tables and figures

**Table S1. Summary of CntA structural assignments**

| <b>Structure</b> | <b>Assigned residue range</b> | <b>Mononuclear Fe present?</b> | <b>[2Fe-2S] present?</b> | <b>Oligomeric state</b> | <b>RMSD to Apo</b> |
|------------------|-------------------------------|--------------------------------|--------------------------|-------------------------|--------------------|
| Apo              | 4-210, 223-240, 256-371       | No                             | Yes                      | Trimer                  | -                  |
| carnitine-bound  | 4-239, 256-371                | Yes                            | Yes                      | Trimer                  | 0.595              |
| gBB-bound        | 4-214, 224-240, 256-371       | Yes                            | Yes                      | Trimer                  | 0.379              |
| MMV12-bound      | 3-247, 253-371                | Yes                            | Yes                      | Trimer                  | 1.127              |

gBB =  $\gamma$ -butyrobetaine. MMV12 (MMV020670), an inhibitor compound for CntA.

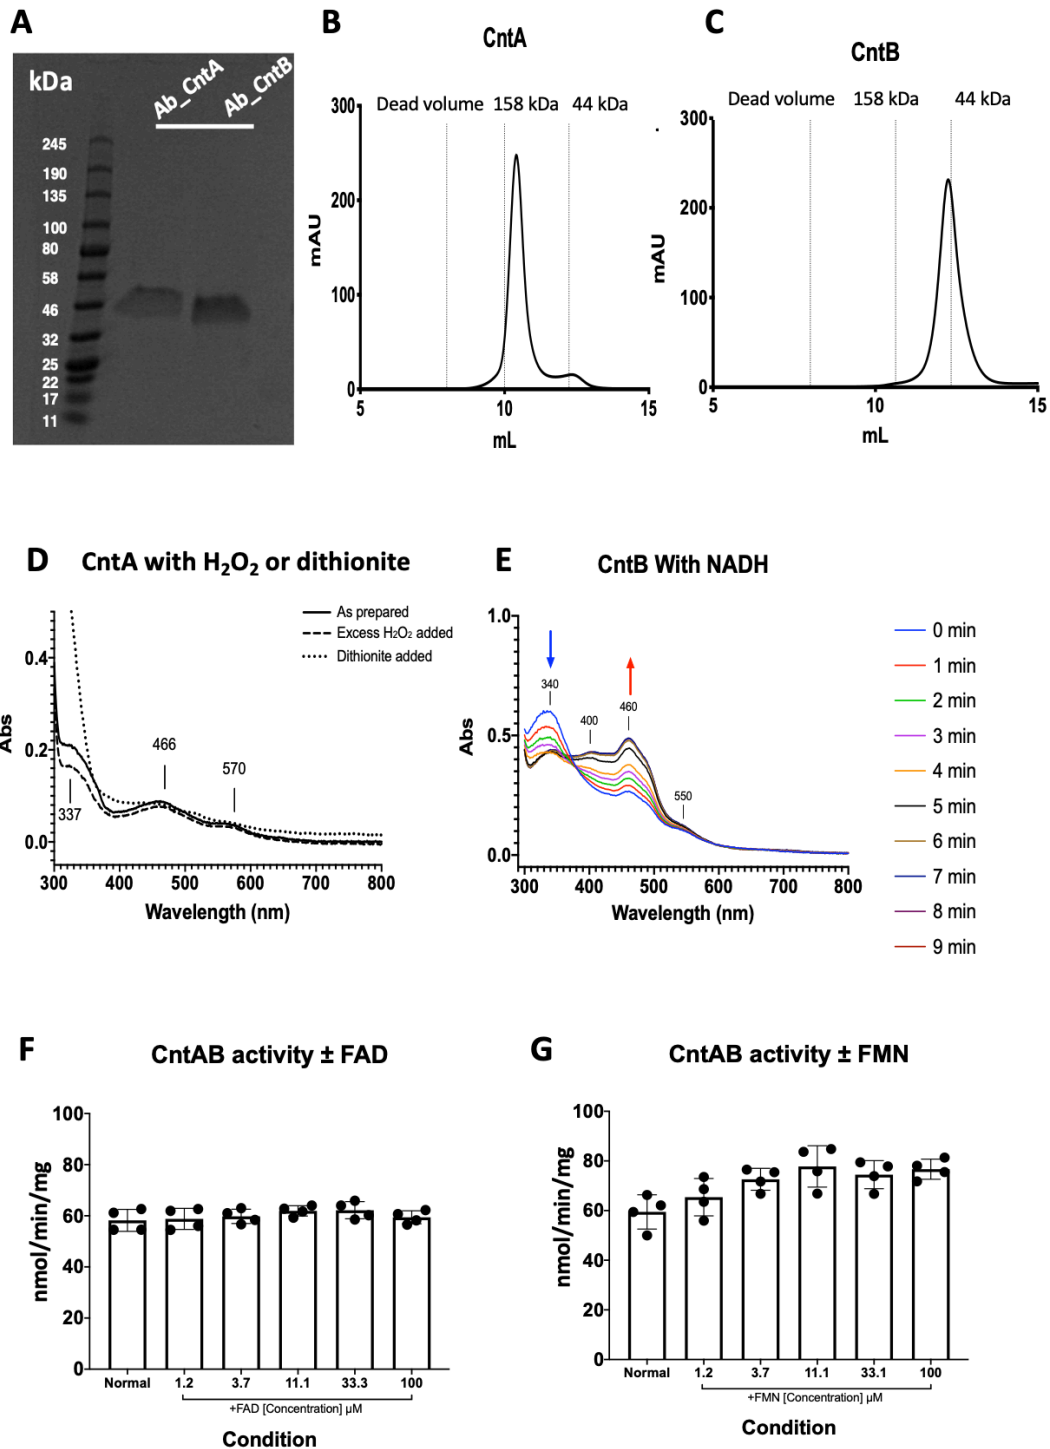

**Figure S1** **A** an SDS-PAGE gel of the purified CntA and CntB proteins. Analytical gel filtrations of CntA (**B**) and CntB (**C**) respectively; **D**, CntA UV-Vis spectrum with added H<sub>2</sub>O<sub>2</sub> or dithionate. **E**, CntB UV-Vis spectrum recorded over time showing rapid NADH consumption by the CntB reductase subunit. The addition of FAD (**F**) or FMN (**G**) ranging from 1.2 to 100 μM has little impact on the activity of carnitine oxygenase.

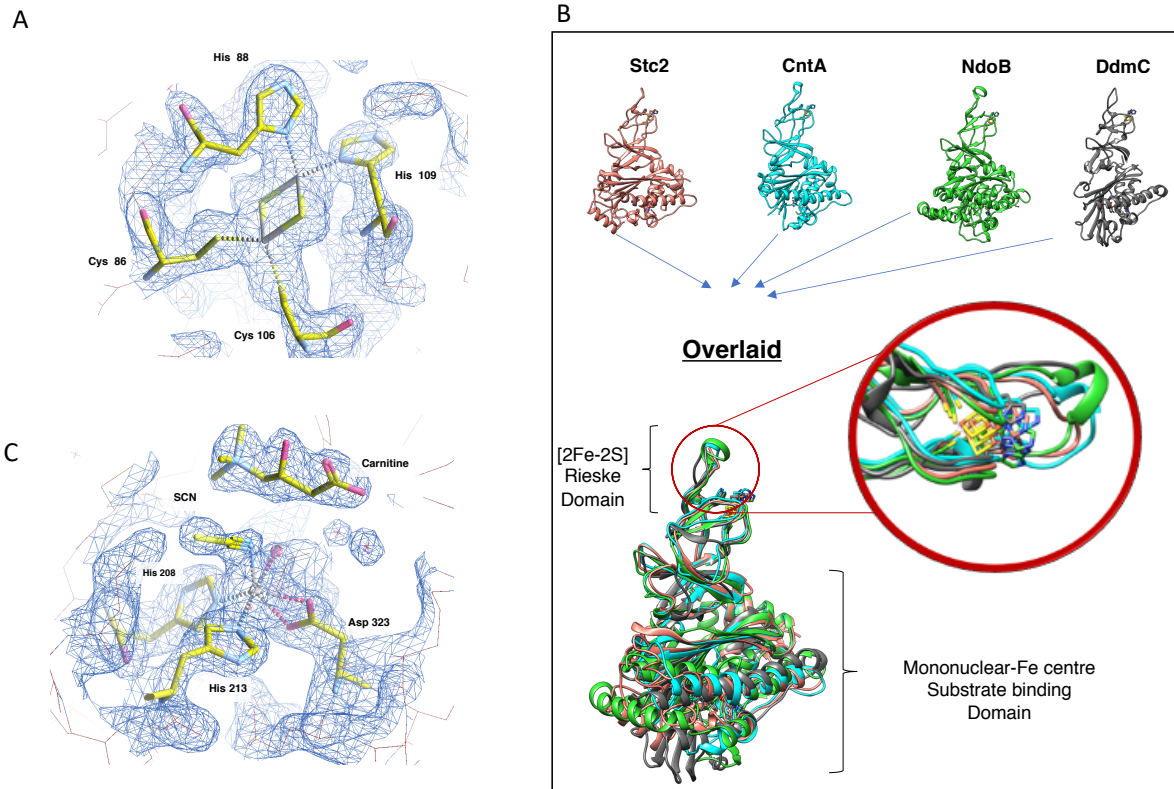

**Figure S2 A:**  $2mF_o - DF_c$  map at  $1.5\sigma$  of the electron density map (Blue) of the Rieske center in CntA. **B:** Comparison of Rieske oxygenase subunits of Stc2, CntA, NdoB and DdmC with a conserved structural feature in the Rieske domain but high variability in the mononuclear Fe centre. **C:**  $2mF_o - DF_c$  map at  $1.5\sigma$  of the electron density map (Blue) of the Mononuclear Fe centre in CntA coordinated by the His-His-Asp triade of residues, with the Fe also coordinating a water molecule and  $[SCN]^-$  ion. The carnitine substrate is shown above.

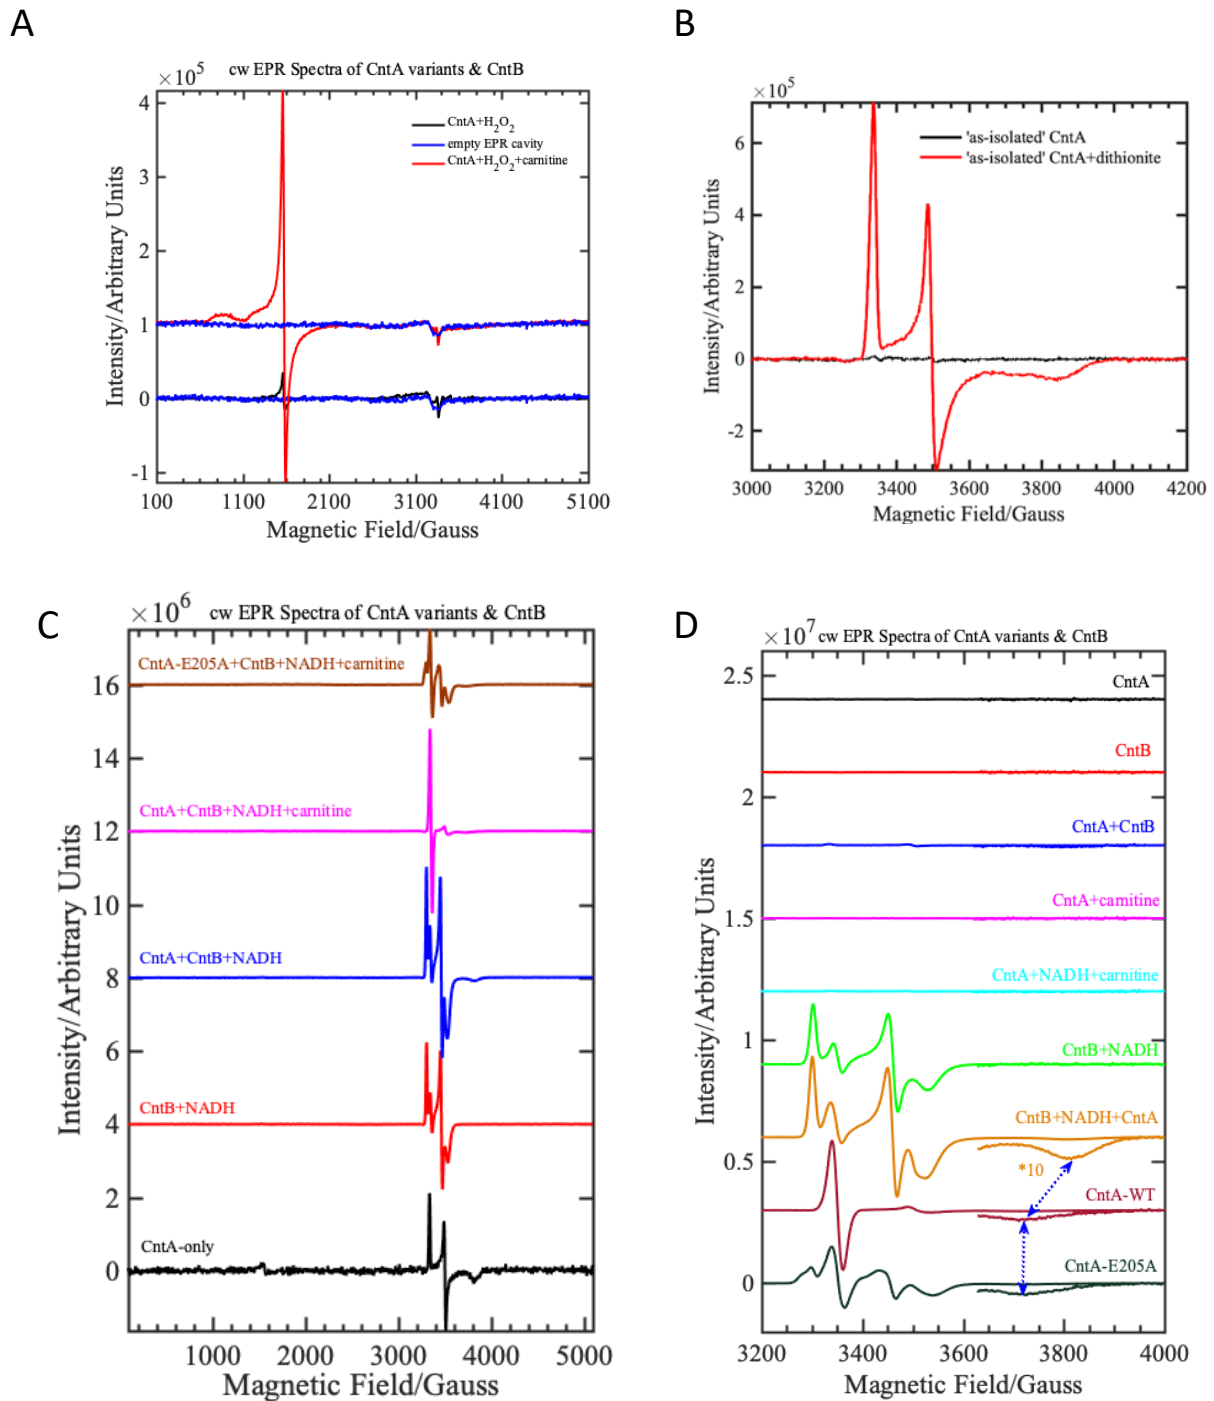

**Figure S3 A**, The addition of H<sub>2</sub>O<sub>2</sub> to the ‘as-isolated’ CntA in the presence of carnitine giving a strong EPR signal of the high-spin ( $S = 5/2$ ) ferric iron (red trace) compared to CntA + H<sub>2</sub>O<sub>2</sub> only (black trace) and the control (blue trace). **B**, The addition of dithionite to the ‘as-isolated’ CntA led to the formation of EPR active, one-electron reduced, Rieske  $[2\text{Fe-2S}]^{+1}$  centre in CntA, confirming that the Rieske centre present in an oxidised state,  $[2\text{Fe-2S}]^{+2}$  in the ‘as-isolated’ CntA. Wide (Panel **C**) and narrow (Panel **D**) swept, cw-EPR spectra of the CntAB proteins and CntA- E205A mutant under various experimental conditions (CntA, CntB, CntA + CntB, CntA + carnitine, CntA + NADH + carnitine) in the presence and absence of NADH and substrate, L- carnitine respectively; The vertical and slanting double-headed,

dotted blue arrows in figure S3D imply a shift in  $g_3$  when substrate, L-carnitine is present in addition to CntB+NADH+CntA for the CntA-WT (wide red trace) and CntA-E205A (olive green trace) proteins. The EPR spectrum of the CntA-E205A mutant (Figure S3D; olive green trace) demonstrates the disruption of the intra/inter subunit electron transfer between the reductase (CntB) and oxygenase (CntA) domains. Experimental conditions – as described in Figure 1F in main text.

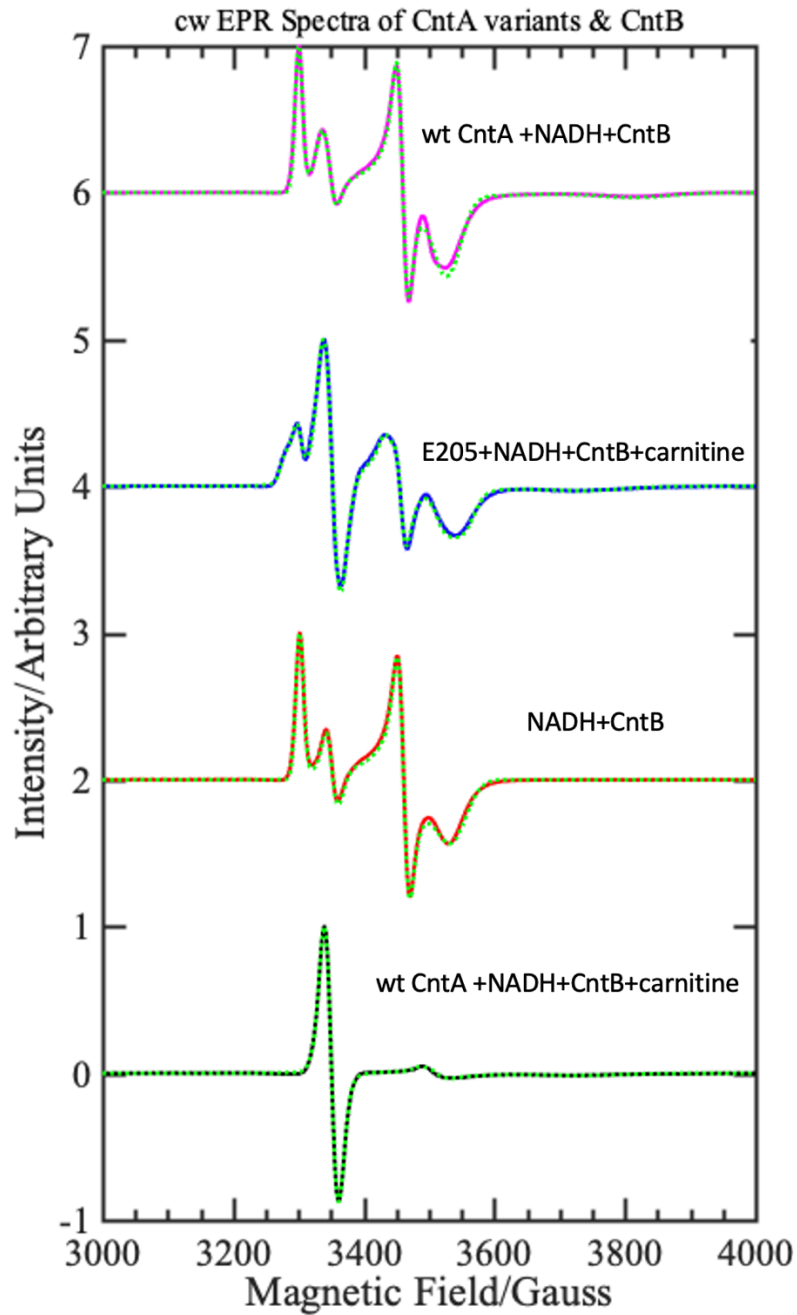

**Figure S4**, Experimental (black, red, blue and magenta traces) and simulated (green dotted lines) EPR spectra of the CntAB proteins and its mutant, CntA-E205A (blue trace) measured as a frozen solution at 20 K. The EPR spectra were successfully simulated using the spin-Hamiltonian parameters given in **Table 2** of main text; Experimental conditions – as described in Figure 1F in main text.

**A**

Ligand interaction maps – CntA + Carnitine

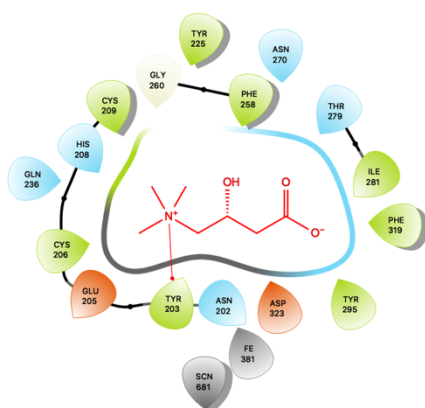

● Charged (negative)    ● Glycine    ● Metal  
● Charged (positive)    ● Hydrophobic    ● Polar    ● Unspecified residue  
— Pi-cation

**B**Ligand interaction maps – CntA +  $\gamma$ -butyrobetaine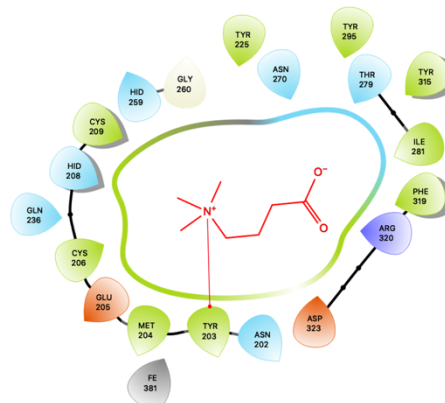**C**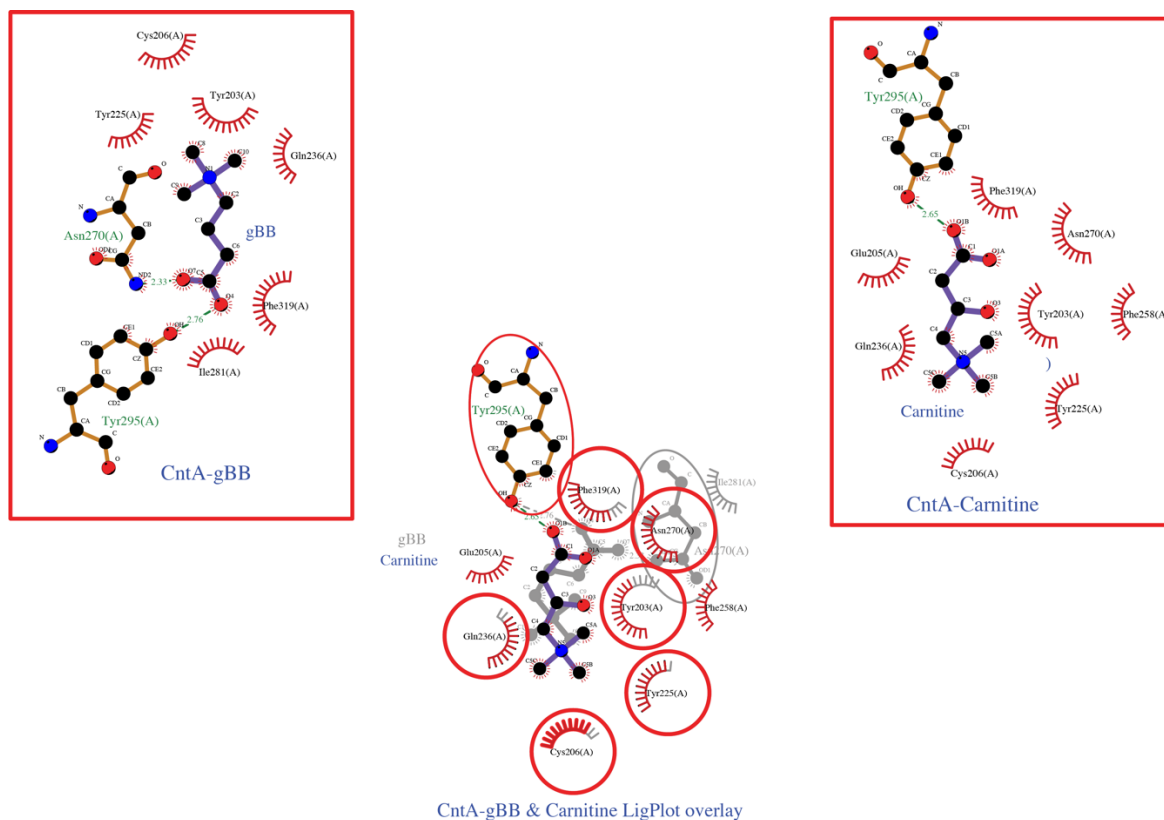

**Figure S5** Ligand interaction map of (A) carnitine and (B)  $\gamma$ -butyrobetaine in the CntA active site. Panel (C) shows a LigPlot interaction map with hydrophobic interactions shown as Red eyelashes and hydrogen bonds shown as Green dashed lines. (gBB =  $\gamma$ -butyrobetaine)

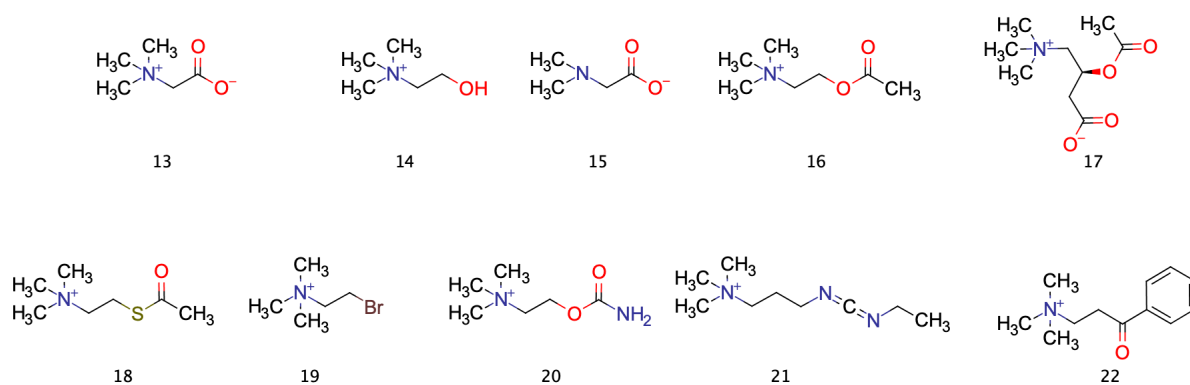

**Figure S6** Series of compounds tested for activity: **(13)** Glycine betaine, **(14)** Choline, **(15)** N,N-dimethylglycine, **(16)** L-acetylcarnitine, **(17)** Acetylcholine, **(18)** Acetylthiocholine, **(19)** (2-Bromoethyl)Trimethylammonium, **(20)** Carbachol, **(21)** 3-[[[(Ethylimino)methylene]amino]-N,N,N-trimethyl-1-propanaminium, **(22)** N,N,N-Trimethyl-3-oxo-3-phenylpropan-1-aminium.



**A**

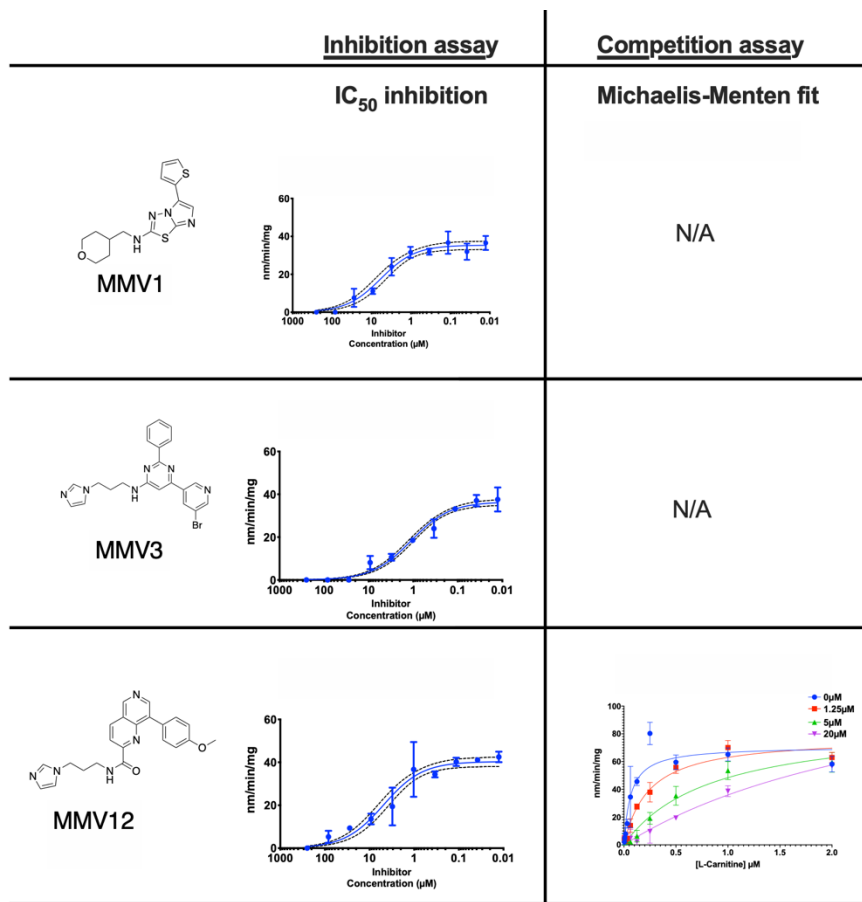

**B**

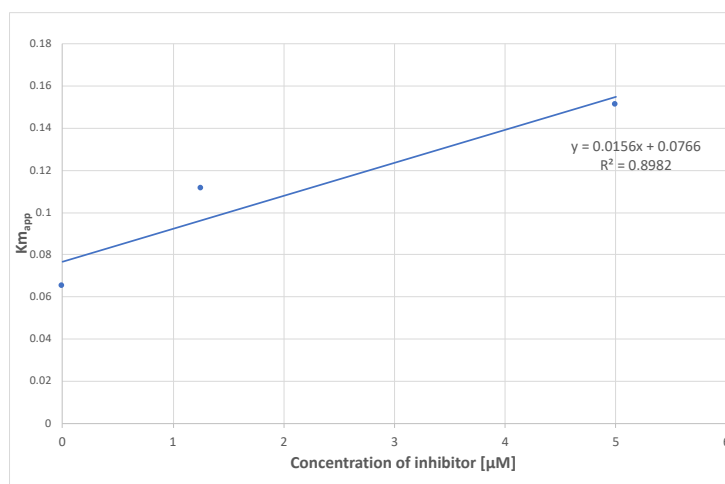

**Figure S7, A:** Assay of inhibition of CntA by the inhibitors. Inhibitory IC<sub>50</sub> dose responses (column 1) and competition assays for active site competitiveness determination with raw data (column 2) then fitted to a Prism model for competitive inhibitors (column 3). **B:** Plot of  $K_{m,app}$  vs Inhibitor concentration for MMV12 showing a linear trend at concentrations (0, 1.25 and 5  $\mu$ M).

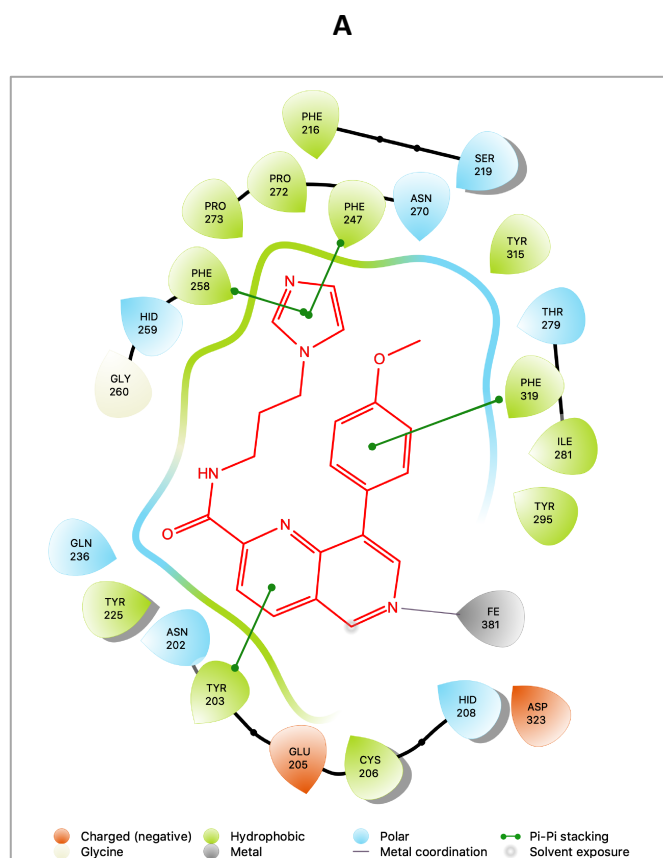

**Figure S8** In Panel (A) is a ligand interaction map of MMV12 (MMV020670) in the CntA active site and the corresponding LigPlot interaction map in (B). Hydrophobic interactions shown as Red eyelashes and hydrogen bonds shown as Red dashed lines.

MMV12

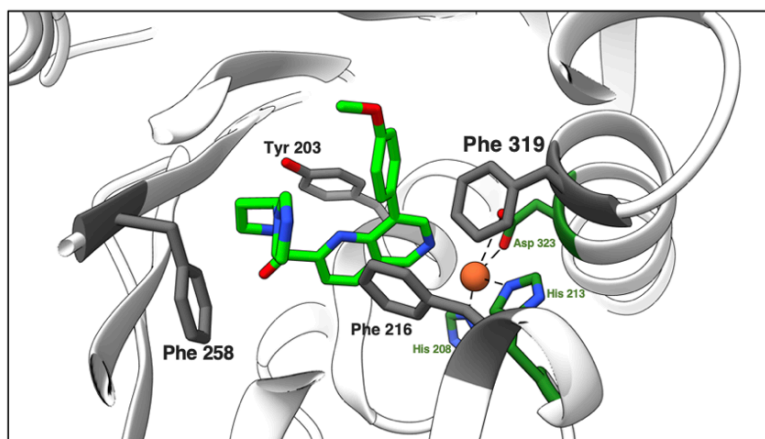

MMV1

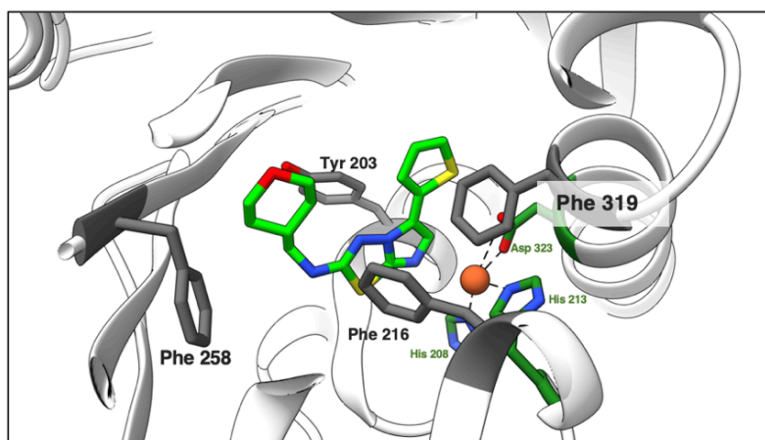

MMV3

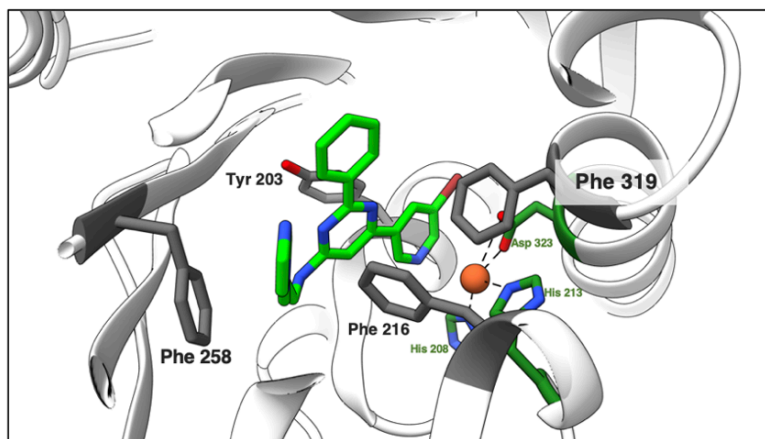

**Figure S9**, Compound-binding pockets of the inhibitor MMV12 in CntA structure and the docking of MMV1 and MMV3 in CntA.

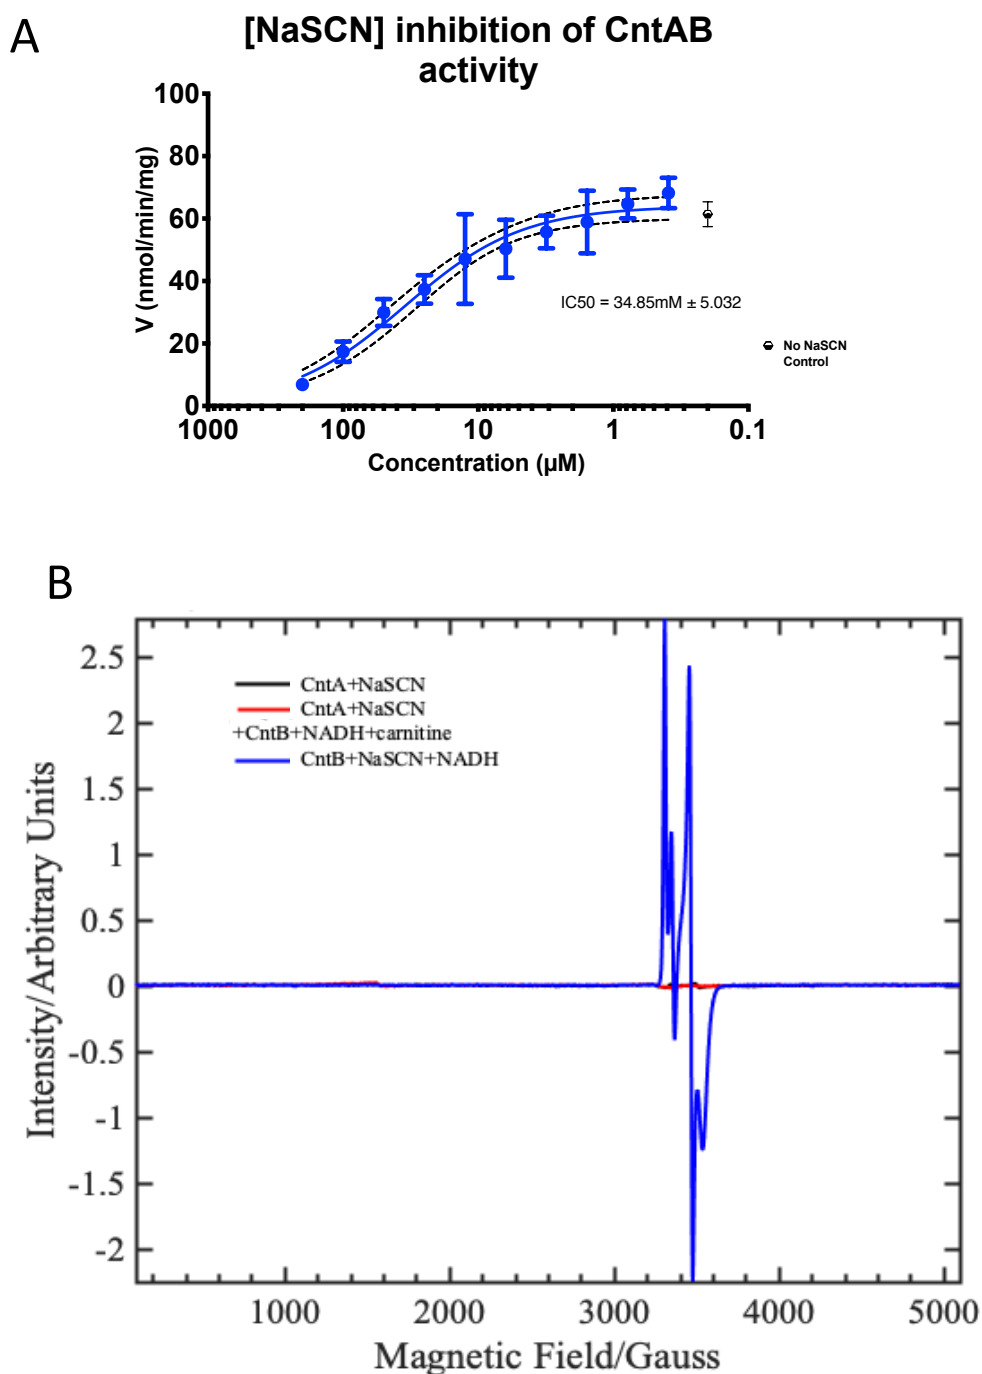

**Figure S10 A:** Dose response inhibition of CntA activity in the presence of NaSCN (N=3). Error bars are standard deviations and the  $IC_{50}$  was calculated in Prism. **B:** cw-EPR spectra of CntA+NaSCN (black trace) and CntA + NaSCN + CntB + NADH + Carnitine (red trace) measured as a frozen solution at 20 K. The observation of EPR silent behaviour for [CntA + NaSCN + CntB + NADH + Carnitine; red trace] implies that NaSCN may have inhibited CntA activity. However, the EPR spectrum of the corresponding control, [CntB + NaSCN + NADH; blue trace], shows the formation of the expected one-electron, reduced ferredoxin,  $[2Fe-2S]^{+1}$  centre and flavin radical demonstrating that the NaSCN does not impact CntB functionality.

## Appendix 1

Phylogeny Abbreviations, their corresponding species, and gi/accession numbers in the GenBank database are as follows:

OxoO, *P. putida* 86, 2072732; CarAa, *Pseudomonas* sp. strain CA10, 2317678; VanA, *Pseudomonas* sp. HR199, 1946284; DdmC, *Pseudomonas maltophilia* DI-6, 55584974; TsaM, *Comamonas testosteroni* T-2, 1790867; PobA, *P. pseudoalcaligenes* POB310, 473250; LigX, *Sphingomonas paucimobilis* SYK-6, 4062861; NdmA, *P. putida* CBB5, AFD03116; NdmB, *P. putida* CBB5, AFD03117; BphA1, *P. pseudoalcaligenes* KF707, 151091; IpBAa, *P. putida* RE204, 2822265; BpdC1, *Rhodococcus* sp. strain M5, 927232; BedC1, *P. putida* ML2, 1168640; HcaE, *E. coli* K-12, 81170783; BphA1, *Rhodococcus erythropolis* TA421, 3059209; PhnA1a, *Sphingomonas* sp. strain CHY-1, 75455648; ArhA1, *Sphingomonas* sp. strain A4, 50725019; NahAc, *Pseudomonas* sp. strain JS42, 1224114; DntAc, *Burkholderia cepacia* R34, 17942397; PhtAa, *Mycobacterium vanbaalenii* PYR-1, 49072886; NarAa, *Rhodococcus* sp. strain NCIMB12038, 4704462; NidA, *M. vanbaalenii* PYR-1, 11038552; PhdA, *Nocardioides* sp. strain KP7, 7619816; NidA3, *M. vanbaalenii* PYR-1, 68053509; CmtAb, *P. putida* F1, 1263180; PsbAb, *Rhodopseudomonas palustris*, 5360700; AtdA, *Acinetobacter* sp. strain YAA, 1395141; TdnA1, *P. putida* UCC22, 1841362; AntA, *Acinetobacter* sp. ADP1, 3511232; CbdC, *Burkholderia cepacia* 2CBS, 758210; XylX, *P. putida* TOL, 139861; CmoS, *Spinacia oleracea*, AAB52509; CmoB, *Beta vulgaris*, AAB80954; CmoA, *Amaranthus tricolor*, AAK82768; CntA, *A. baumannii* ATCC 19606, EEX03955; OxyBAC, *Pseudomonas* sp. BIOMIG1, 1057213843; Stc2, *S. meliloti* 1021, 16262853; BmoA, *C. salexigens* DSM 3043, 759867680; GbcA, *P. aeruginosa* PAO1, 15600603.
